# Supplementary material for: Uni-directional ciliary membrane protein trafficking by a cytoplasmic retrograde IFT motor and ciliary ectosome shedding
Source: eLife journal article supplement (doi:10.7554/elife.05242), 2015-02-16

Figure 4—figure supplement 1

Model illustrating unidirectional trafficking of SAG1 during ciliary adhesion and signaling.

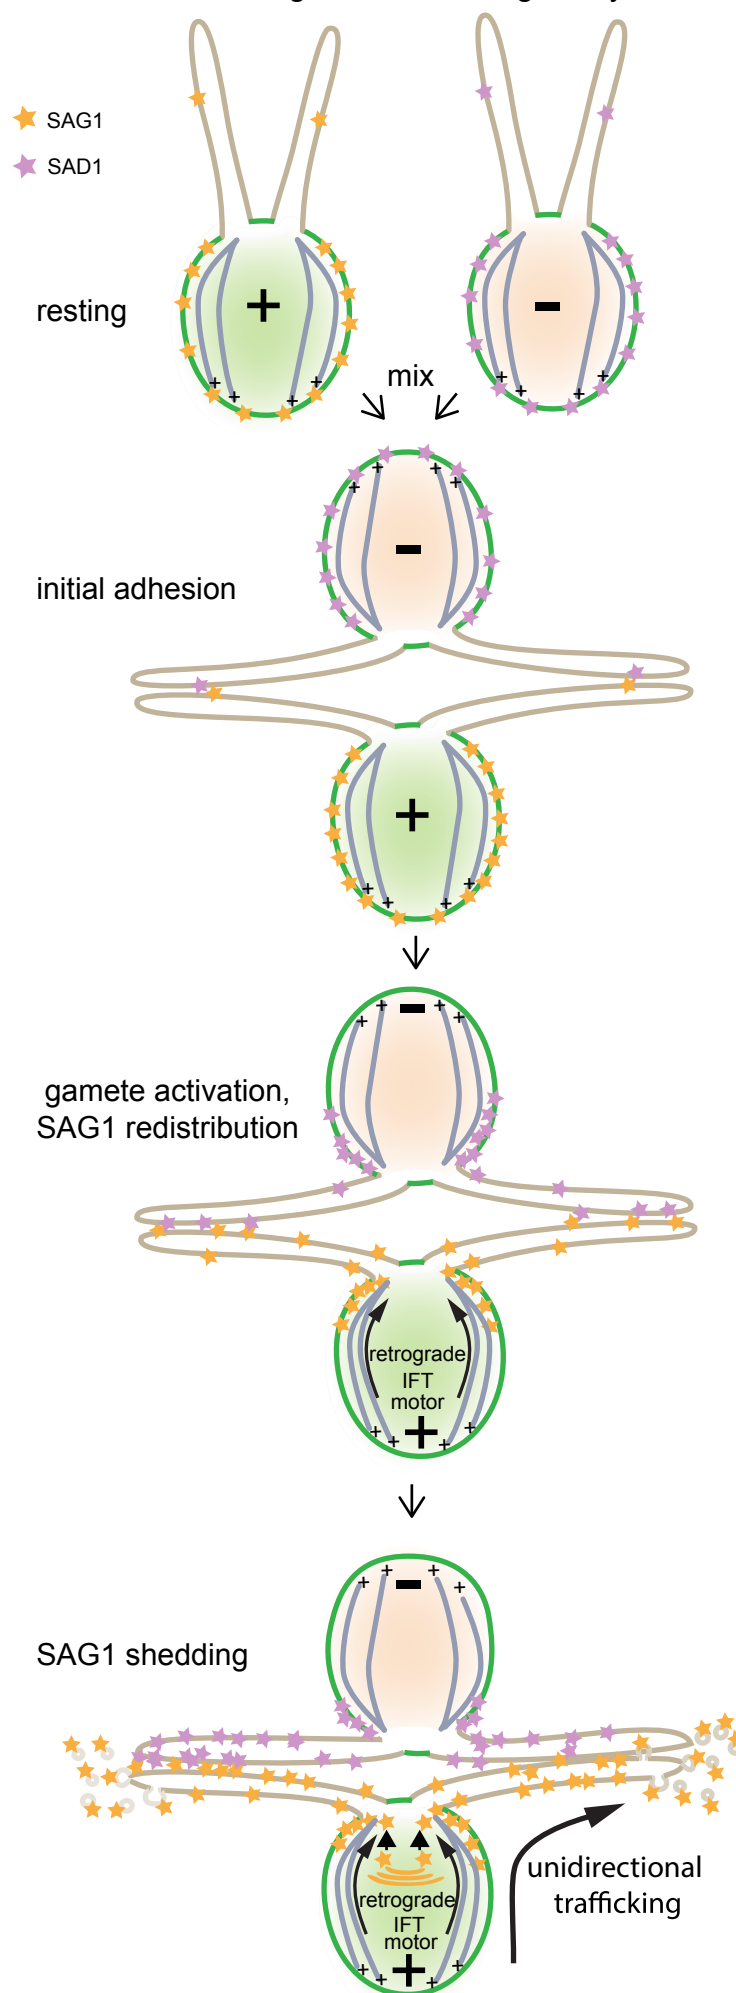

Supplement: supp [file elife-05242-supp-v1.zip]
